# Supplementary material for: Rapid mechanochemical preparation of a sandwich-like charge transfer complex
Source: Royal Society of Chemistry journal article supplement (doi:10.1039/c3ce40585k), 2013-01-01
Supplement: c3ce40585k.pdf [file c3ce40585k.pdf]

# *Supporting Information*

*for*

## **Rapid Mechanochemical Preparation of a Sandwich-like Charge Transfer Complex**

Hao Chen, Fan Gao, Erdong Yao, Qi Chen, Yuguo Ma\*

*Beijing National Laboratory for Molecular Sciences (BNLMS), Key Lab of Polymer Chemistry & Physics of Ministry of Education, College of Chemistry, Peking University, Beijing 100871, China*

*Email: ygma@pku.edu.cn*

| <b>Table of Contents</b>                                                | <b>Page</b> |
|-------------------------------------------------------------------------|-------------|
| 1. Experimental Section                                                 | <b>S2</b>   |
| 2. <sup>1</sup> H NMR, <sup>13</sup> C NMR, <sup>19</sup> F NMR Spectra | <b>S4</b>   |
| 3. Solid-state <sup>13</sup> C NMR Spectra                              | <b>S10</b>  |
| 4. Emission Spectra and UV-Vis absorption spectra                       | <b>S11</b>  |
| 5. Electrochemical Characterizations                                    | <b>S12</b>  |
| 6. Computational Studies                                                | <b>S13</b>  |
| 7. X-ray Diffraction Pattern                                            | <b>S14</b>  |
| 8. Crystal Data and Structure Refinement                                | <b>S16</b>  |

## 1. Experimental Section

**General Methods:** Chemicals were purchased commercially and used without further purification. All air and moisture sensitive reactions were performed under a nitrogen ( $N_2$ ) atmosphere using standard Schlenk techniques. Toluene was freshly distilled from sodium under  $N_2$  prior to use.  $^1H$  and  $^{19}F$  NMR spectra were recorded on a Varian Mercury-300 (300 MHz) or Bruker-400 (400 MHz) spectrometer, and  $^{13}C$  spectra were recorded on a Bruker-400 (400 MHz) spectrometer using  $CDCl_3$  as solvent. Chemical shifts are reported in parts per million (ppm) and coupling constants are reported in hertz (Hz).  $^1H$  NMR chemical shifts were referenced versus TMS (0 ppm),  $^{13}C$  NMR chemical shifts were referenced versus  $CDCl_3$  (77.16 ppm) and  $^{19}F$  NMR chemical shifts were referenced versus a  $CF_3CO_2H$  external standard (0 ppm). Solid-state NMR spectrum of CT complex **1** was recorded on BRUKER AVANCE III 400M spectrometer (FT, 100 MHz for  $^{13}C$ ). High-resolution mass spectra (HRMS) were recorded on a Bruker Apex IV FTMS mass spectrometer using ESI (electrospray ionization). Cyclic voltammograms (CVs) were recorded on a CHI706A electrochemical analyzer using glassy carbon discs as the working electrode, Pt wire as the counter electrode, Ag/AgCl electrode as the reference electrode, and ferrocene/ferrocenium as an internal reference. The scan speed was 100 mV/s. A solution of tetrabutylammonium hexafluorophosphate ( $TBAPF_6$ ) in  $CH_2Cl_2$  (0.1 M) was employed as the supporting electrolyte. Powder X-ray diffraction data was collected on a PHILIPS X'Pert Pro diffractometer with an X'celerator detector in the reflection mode at 30 °C, using monochromatized Cu  $K\alpha$  radiation. Single crystal

X-ray diffraction data was collected with a NONIUS Kappa CCD diffractometer for CT complex **1**, with graphite monochromator and Mo K $\alpha$  radiation [ $\lambda$  (Mo K $\alpha$ ) = 0.71073 Å]. Structures were solved by direct methods with SHELXS-97 and refined against F<sup>2</sup> with SHELXS-97.

Mechanochemistry: in a typical experiment, 36 mg (0.2 mmol) of AN and 112 mg (0.4 mmol) of TFAQ were placed in a mortar and ground for 10 min with few drops hexane added. Solvent-free manual grinding was also carried out and showed the CT complex formation from the change of color, which required about half an hour.

Compound **TFAQ** was synthesized according to reference.<sup>[1]</sup>

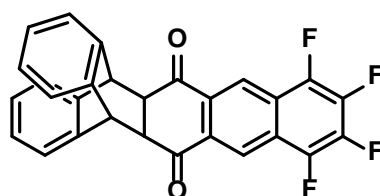

Adduct **2**

**Adduct 2:** A Schlenk-adapted tube was charged with 90 mg (0.5 mmol) of **AN** and 62 mg (0.22 mmol) of **TFAQ**, 3 mL of toluene under nitrogen atmosphere. After stirred for 40 h at 110 °C, the solvent was removed under reduced pressure, and the residue was purified by flash column chromatography over silica gel, to afford the product as a yellow solid (66 mg, 0.144 mmol, 66 %)

<sup>1</sup>H NMR (400 MHz, CDCl<sub>3</sub>, ppm):  $\delta$  8.61(s, 2H), 7.47 (m, 2H), 7.23 (m, 2H), 7.12 (m, 2H), 6.80 (m, 2H), 5.05 (s, 2H), 3.48 (s, 2H), <sup>13</sup>C NMR (100 MHz, CDCl<sub>3</sub>, ppm):  $\delta$

195.7, 144.4, 141.9 ( $J_{C-F} = 250$  Hz), 141.8, 141.2, 138.7 ( $J_{C-F} = 250$  Hz), 139.9, 131.8, 126.7, 126.4, 124.7, 123.9, 121.3, 121.2, 50.4, 49.4.  $^{19}\text{F}$  NMR (282 MHz,  $\text{CDCl}_3$ , ppm):  $\delta$  -74.3, -80.5. HR-MS ( $\text{CDCl}_3$ ,  $\text{C}_{28}\text{H}_{14}\text{F}_4\text{O}_2$ ,  $m/z$ ): Found: 481.08305 ( $\text{M}^+$ ), Cal: 481.08221, Error: 0.8 mDa

## 2. $^1\text{H}$ NMR, $^{13}\text{C}$ NMR, $^{19}\text{F}$ NMR Spectra

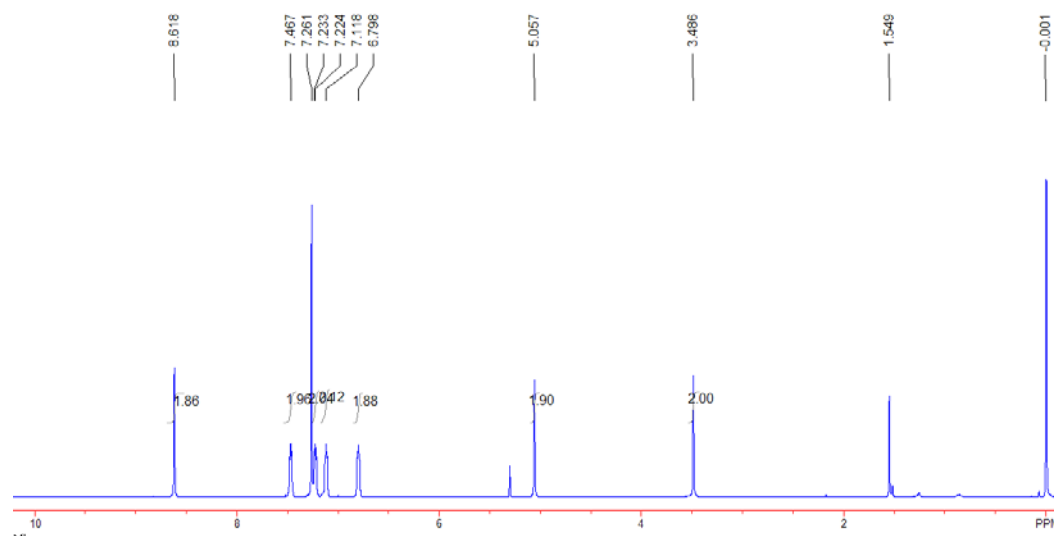

Figure S1.  $^1\text{H}$  NMR spectrum of adduct **2** in  $\text{CDCl}_3$ .

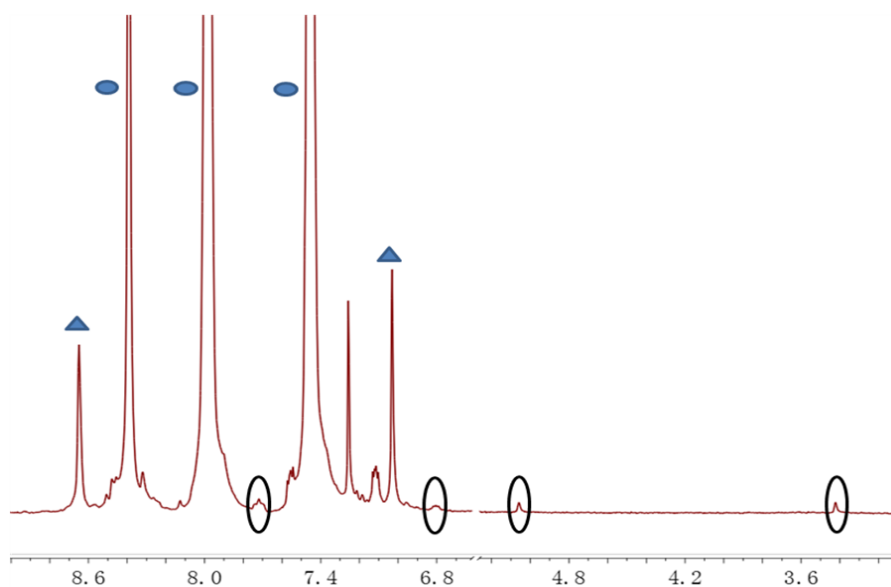

Figure S2. Partial  $^1\text{H}$  NMR spectrum (in  $\text{CDCl}_3$ ) of crude product (AN indicated by

blue oval and **TFAQ** indicated by blue triangle) containing trace amount of adduct **2** (indicated by the black circle) from heating a 1:9 binary mixture of CT complex **1** and **AN** (Figure 3c).

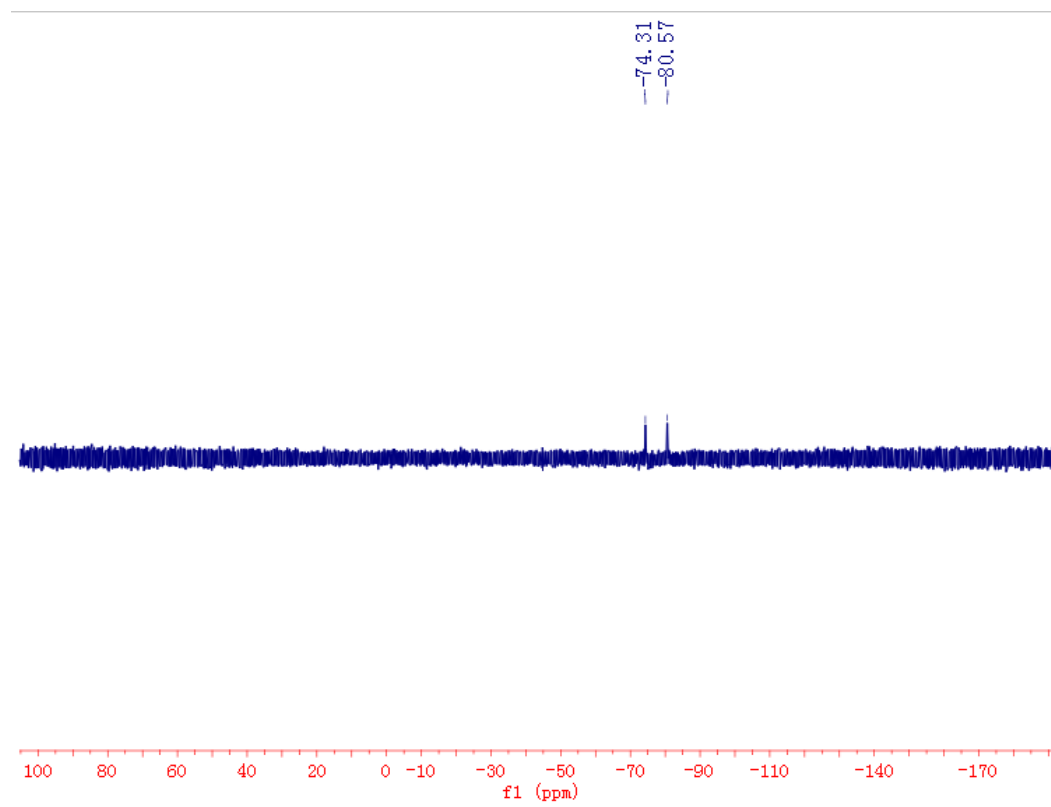

**Figure S3.**  $^{19}\text{F}$  NMR spectrum of adduct **2** in  $\text{CDCl}_3$

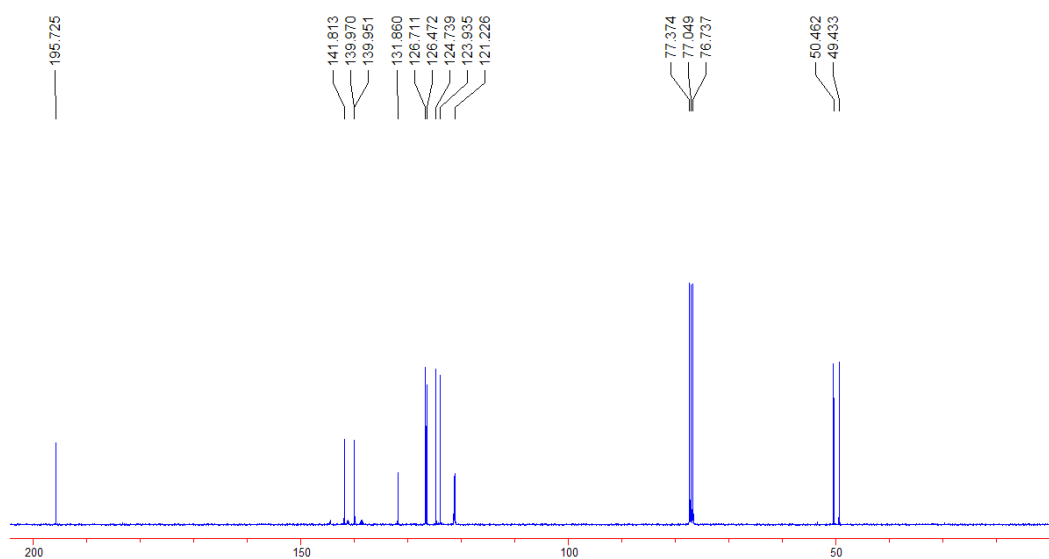

**Figure S4.**  $^{13}\text{C}$  NMR spectrum of adduct **2** in  $\text{CDCl}_3$

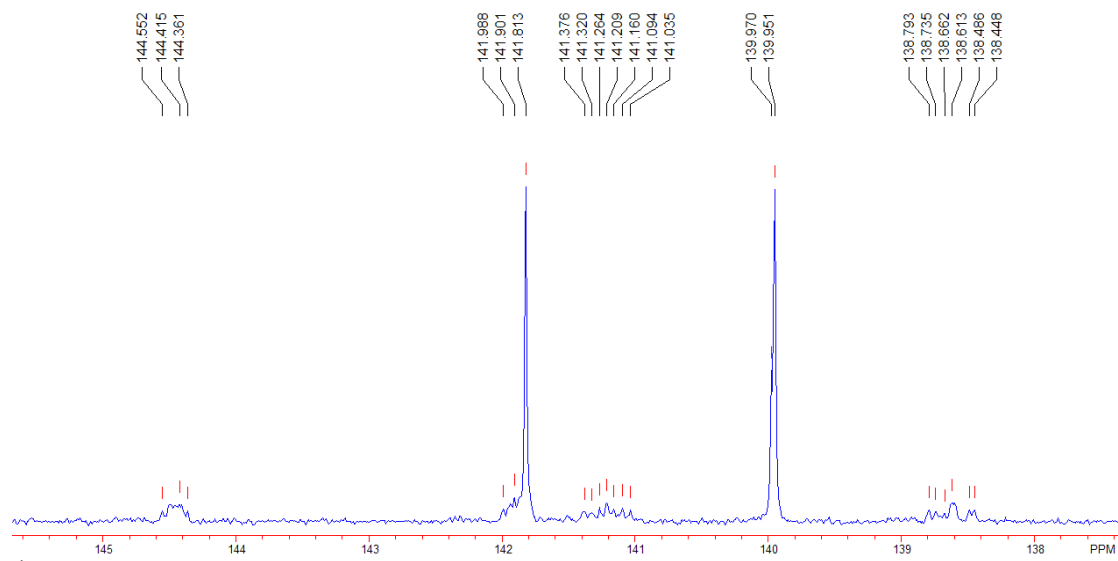

**Figure S5.** Partial  $^{13}\text{C}$  NMR spectrum of adduct **2** in  $\text{CDCl}_3$

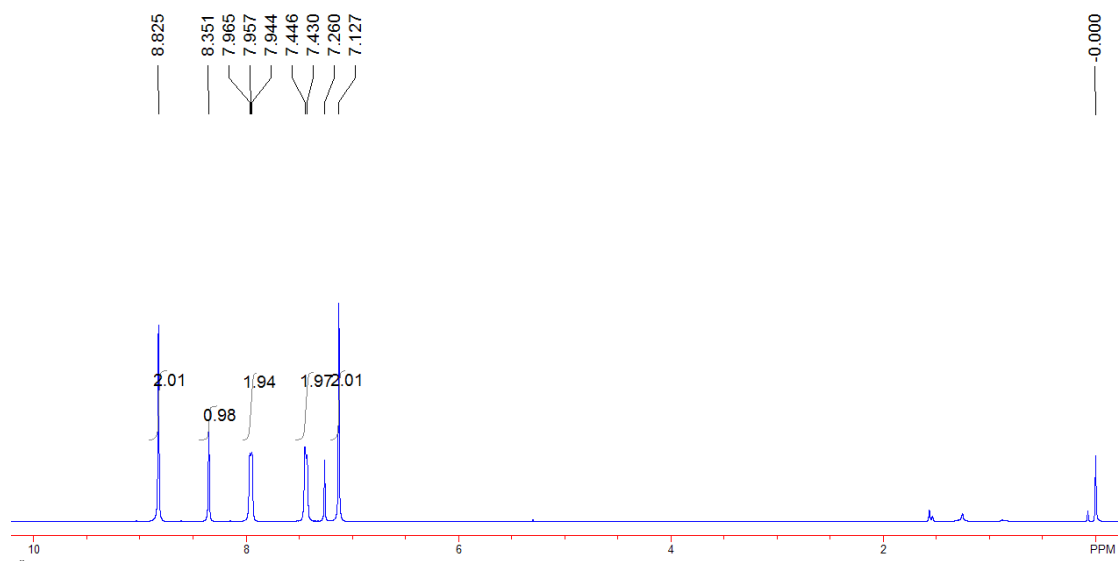

**Figure S6.**  $^1\text{H}$  NMR spectrum of CT complex **1** (grown from solution of AN and TFAQ) in  $\text{CDCl}_3$

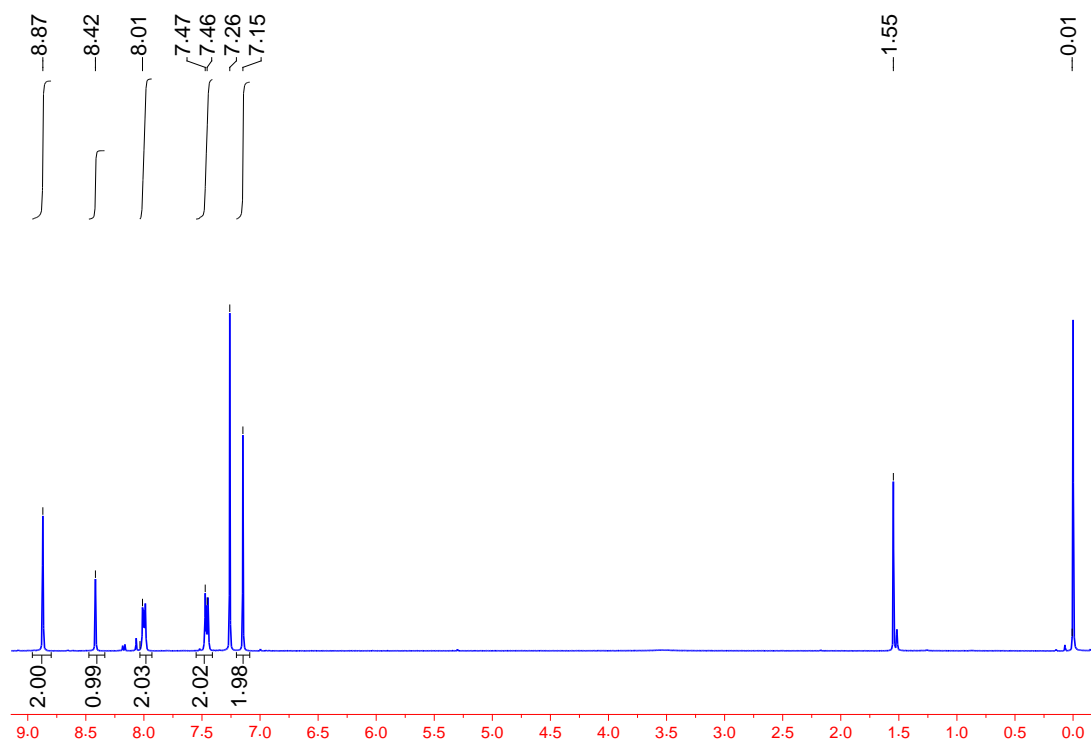

**Figure S7.** <sup>1</sup>H NMR spectrum of CT complex **1** (grown from solution of AN, pyrene, naphthalene and TFAQ) in CDCl<sub>3</sub>

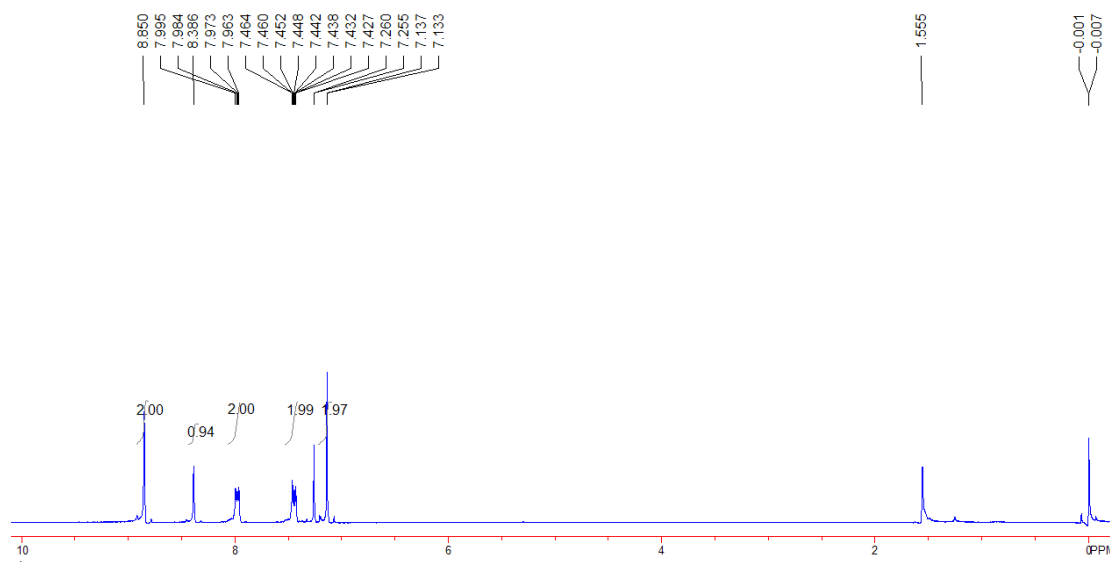

**Figure S8.** <sup>1</sup>H NMR spectrum of CT complex **1** (quickly precipitate from mixing the concentrated chloroform solutions of AN and TFAQ) in CDCl<sub>3</sub>.

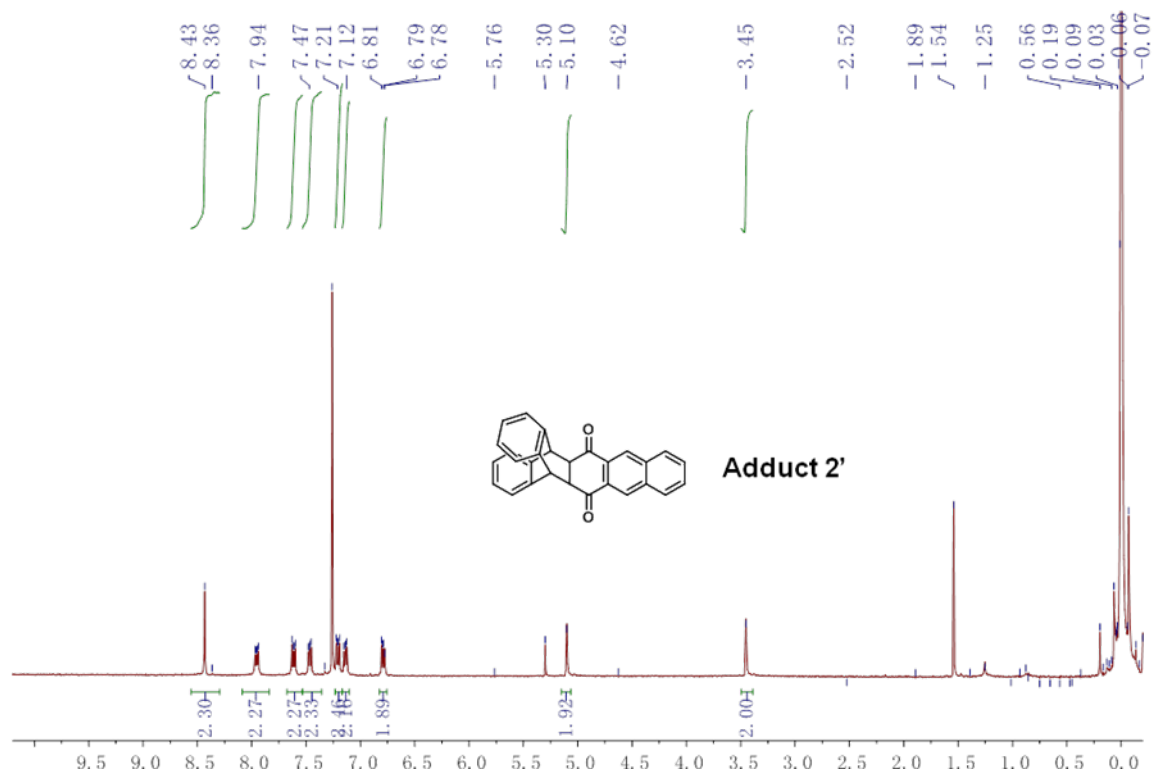

Figure S9. <sup>1</sup>H NMR spectrum of adduct 2' in CDCl<sub>3</sub>.

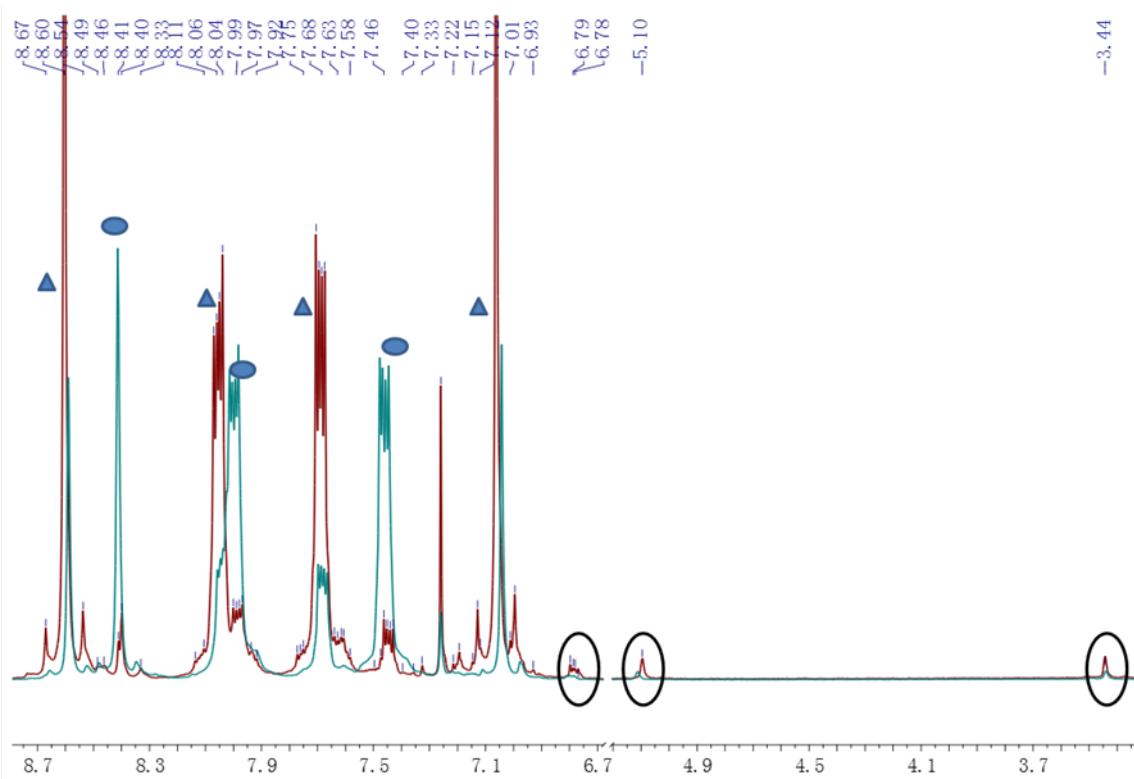

Figure S10. Partial <sup>1</sup>H NMR spectrum (in CDCl<sub>3</sub>) of crude product (AN indicated by blue oval and AQ indicated by blue triangle) containing adduct 2' (indicated by the



black circle) from heating a 1:5 after-grinding binary mixture of **AQ** and **AN** (blue line) and a 2:1 after-grinding binary mixture of **AQ** and **AN** (red line).

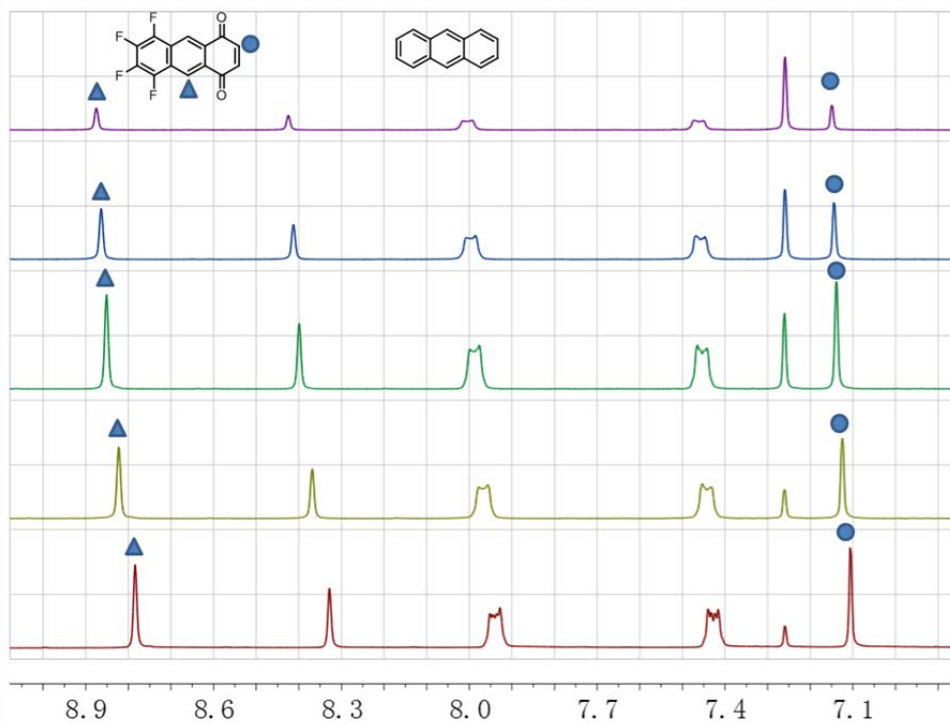

**Figure S11.** Variable concentration <sup>1</sup>H NMR spectrums of **AN** and **TFAQ**. From bottom to top, the concentration of **AN** is  $3.5 \times 10^{-2}$  M,  $1.8 \times 10^{-2}$  M,  $9.0 \times 10^{-3}$  M,  $4.5 \times 10^{-3}$ ,  $2.2 \times 10^{-3}$  M, respectively, while concentration of **TFAQ** is  $7 \times 10^{-2}$  M,  $3.5 \times 10^{-2}$  M,  $1.8 \times 10^{-2}$  M,  $9 \times 10^{-3}$ ,  $4.5 \times 10^{-3}$  M, respectively.

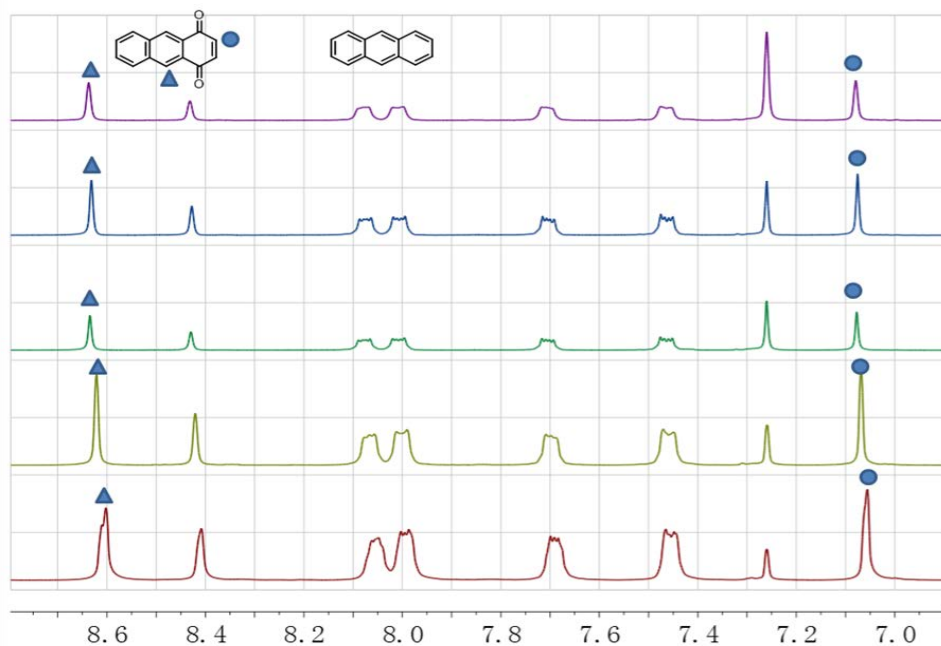

**Figure S12.** Variable concentration  $^1\text{H}$  NMR spectrums of AN and AQ. From bottom to top, the concentration of AN is  $3.5 \times 10^{-2}$  M,  $1.8 \times 10^{-2}$  M,  $9.0 \times 10^{-3}$  M,  $4.5 \times 10^{-3}$ ,  $2.2 \times 10^{-3}$  M, respectively, while concentration of AQ is  $7 \times 10^{-2}$  M,  $3.5 \times 10^{-2}$  M,  $1.8 \times 10^{-2}$  M,  $9 \times 10^{-3}$ ,  $4.5 \times 10^{-3}$  M, respectively.

### 3. Solid-state $^{13}\text{C}$ NMR spectra

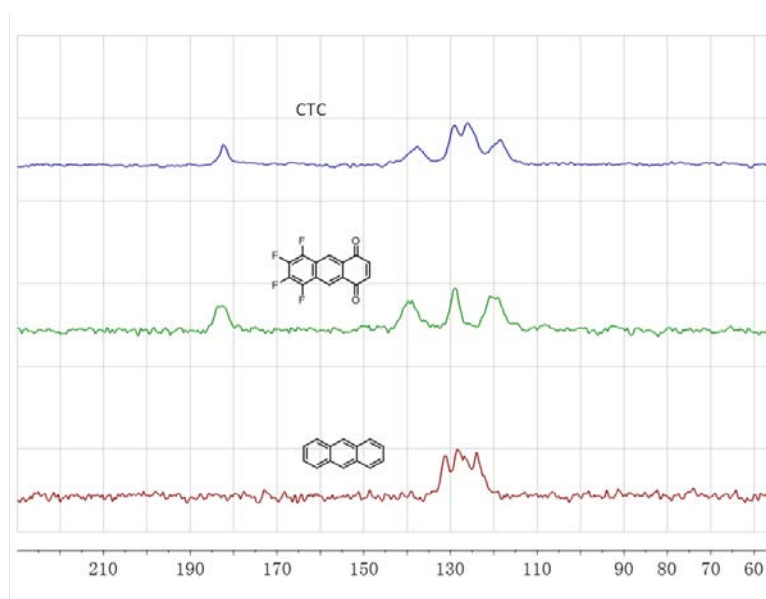

**Figure S13.** Solid-state  $^{13}\text{C}$  NMR spectrums of 1, TFAQ and AN.

#### 4. Emission Spectra and UV-vis absorption spectra

UV-Vis absorption spectra were recorded on a Hitachi U-4100 spectrophotometer using the absorption mode in a 1 cm quartz cell and 1 cm quartz plate. Fluorescence emission spectra were recorded in 1 cm quartz cuvette and 1 cm quartz plate for solid samples on a Horiba Jobin Yvon FluoroMax-4P spectrofluorometer. The emission spectra were corrected for the wavelength dependence of detector sensitivity and monochromator gratings.

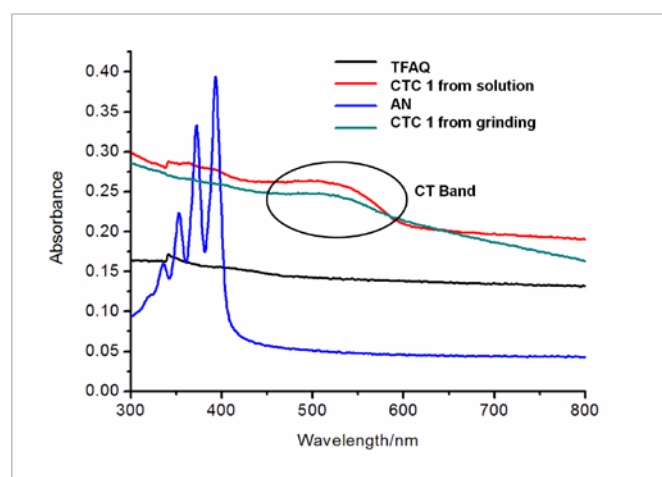

**Figure S14.** UV-Vis spectra in solid state: blue, black, red and green lines correspond to AN, TFAQ, CT complex **1** grown from solution and **1** from grinding, respectively.

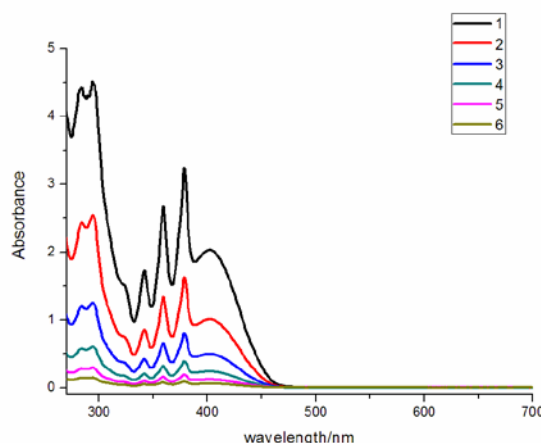

**Figure S15.** Variable concentration UV-Vis spectra of **1** in  $\text{CHCl}_3$  solution (from the top to bottom, the concentration of AN is  $2 \times 10^{-4}$ ,  $1 \times 10^{-4}$ ,  $5 \times 10^{-5}$ ,  $2.5 \times 10^{-5}$ ,  $1.25 \times 10^{-5}$ ,  $6 \times 10^{-6}$  M, respectively, while concentration of TFAQ is  $4 \times 10^{-4}$ ,  $2 \times 10^{-4}$ ,  $1 \times 10^{-4}$ ,  $5 \times 10^{-5}$ ,  $2.5 \times 10^{-5}$ ,  $1.25 \times 10^{-5}$  M, respectively.)

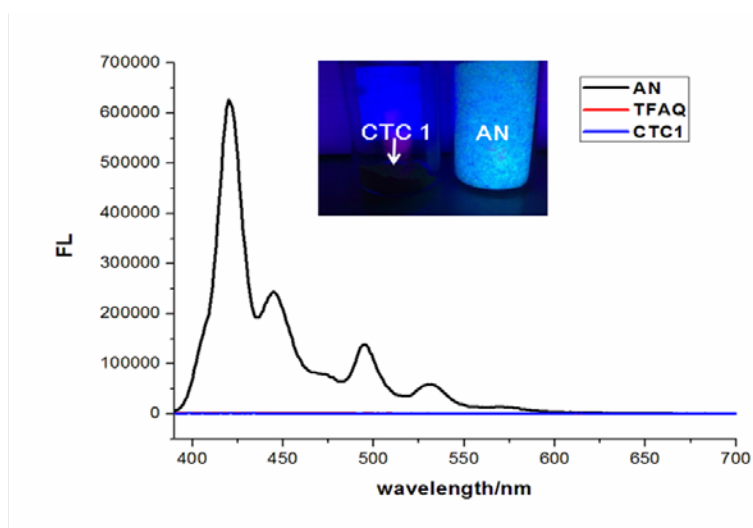

**Figure S16.** Fluorescence emission spectra of AN, TFAQ and **1** in solid state (excited at 372 nm). (Inset: the photo of AN and CTC **1** in solid state excited at 365 nm).

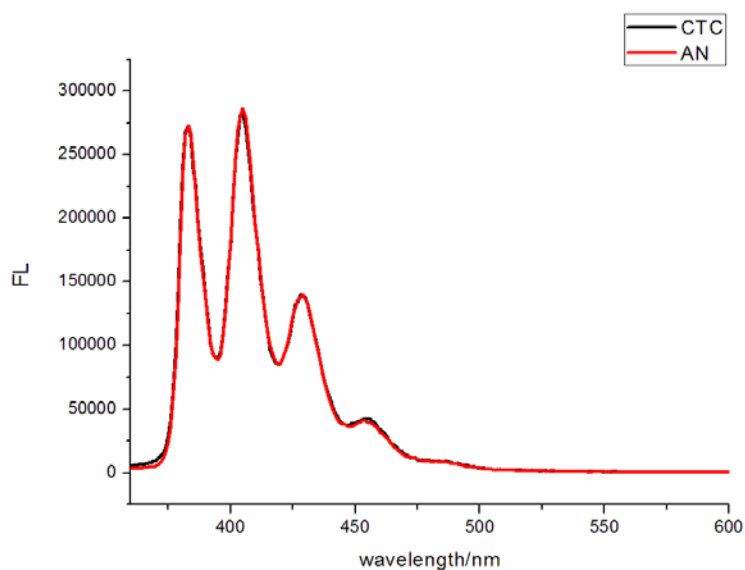

**Figure S17.** Fluorescence emission spectra of AN (red line) and **1** (black line) in CHCl<sub>3</sub> solution (both of the concentration of AN are  $6 \times 10^{-6}$  M). (excited at 341 nm).

## 5. Electrochemical Characterizations

The energy level of Fc/Fc<sup>+</sup> is assumed to be -4.8 eV below the vacuum level.<sup>[2,3]</sup> The LUMO levels of AQ and TFAQ were estimated from the half-wave potentials of the reduction peaks. The half-wave potential of oxidation peak of Fc was measured to be

0.43 V against Ag/AgCl.

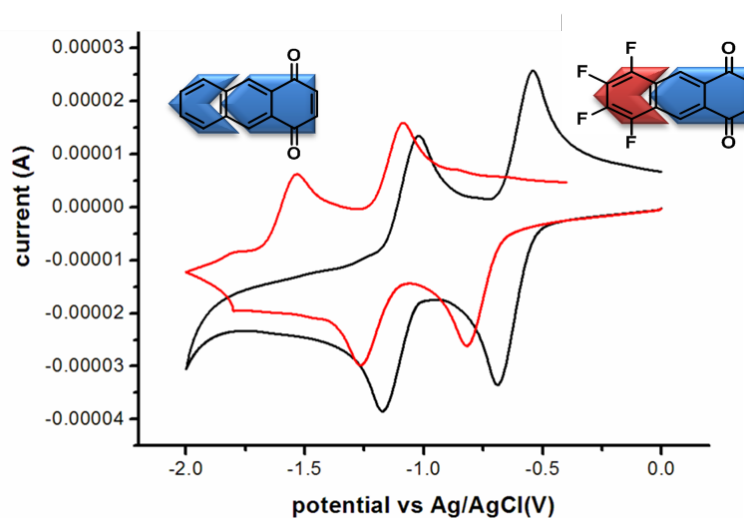

**Figure S18.** CVs of AQ and TFAQ.

## 6. Computational Studies

The geometry of the molecules was optimized with Density Functional Theory (DFT) using B3LYP hybrid functional<sup>4</sup> with a basis set limited to 6-31g\*. Molecular orbital shapes and energies were obtained at optimized geometries. Calculation was performed with the Gaussian03<sup>5</sup> package and the orbital pictures were prepared using Gaussview.<sup>6</sup>

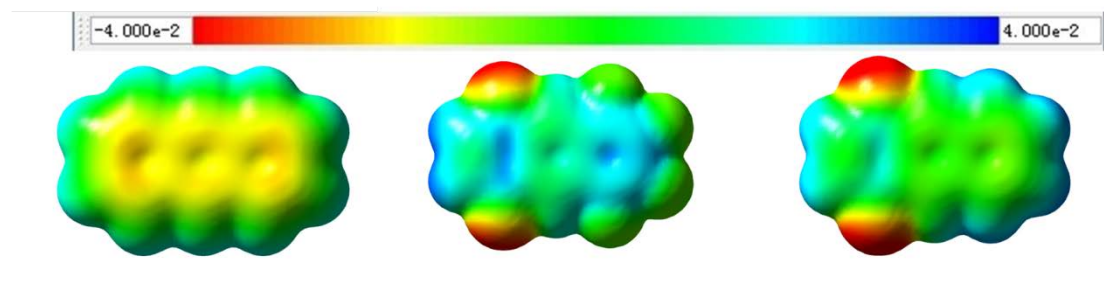

**Figure S19.** DFT calculated electrostatic potential (ESP) of AN, TFAQ and AQ in the same scale (from left to right)

The ESP plots of AN, TFAQ and AQ revealed that TFAQ had the most positive  $\pi$  clouds, while AN had the least and matched TFAQ best.

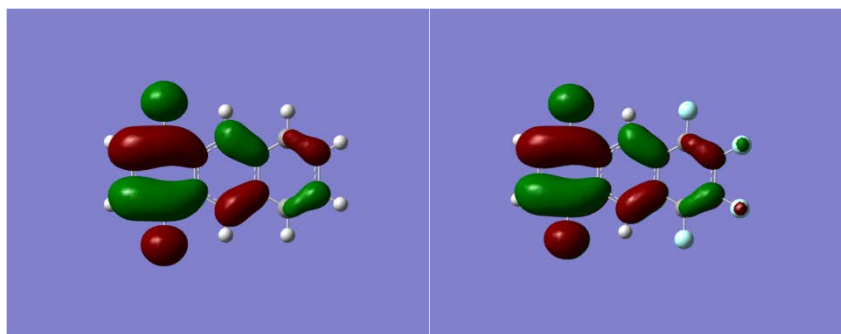

**Figure S20.** DFT calculated LUMO of AQ (left) and TFAQ (right).

**Table S1.** Summary of electronic data in DCM in comparison with calculated results

| Comp.                  | AQ   | TFAQ |
|------------------------|------|------|
| LUMO (eV) <sup>a</sup> | -3.4 | -3.7 |
| LUMO (eV) <sup>b</sup> | -3.0 | -3.3 |

<sup>a</sup> calculated based on CV; <sup>b</sup> calculated based on DFT calculation (The HOMO of AN is -5.2 eV , which is calculated based on DFT calculation).

## 7. X-ray Diffraction Pattern

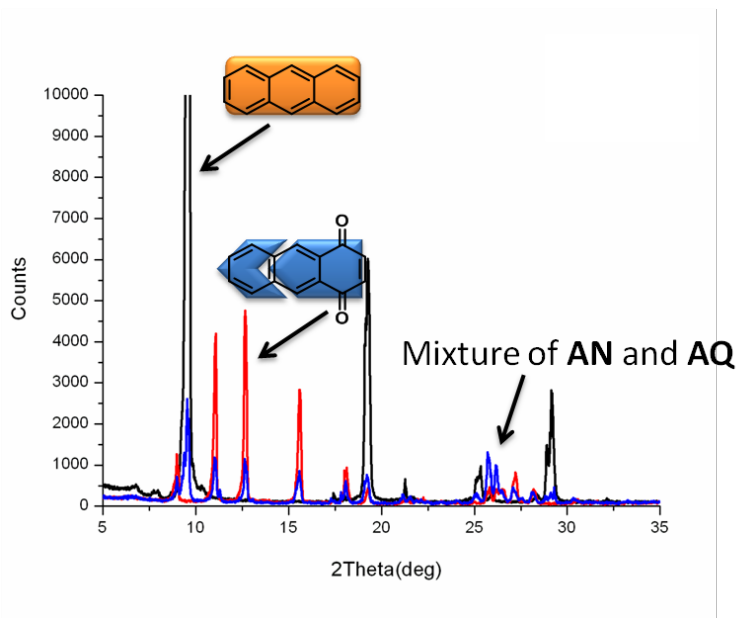

**Figure S21.** X-ray diffraction patterns of AN, AQ, mixture of AN and AQ.

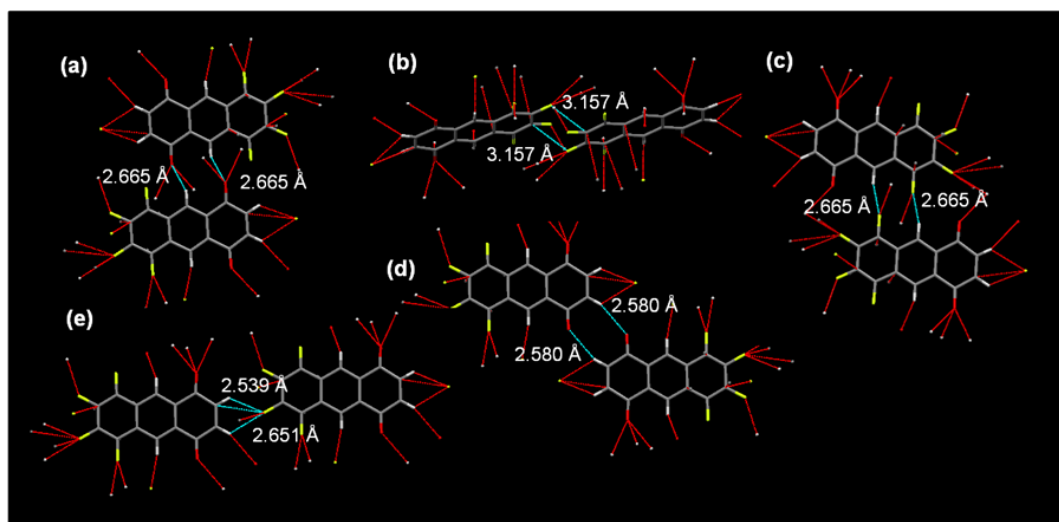

**Figure S22.** Weak C-H...F and C-H...O interactions between two neighbouring TFAQ molecules in the crystal structure of CT complex **1**.

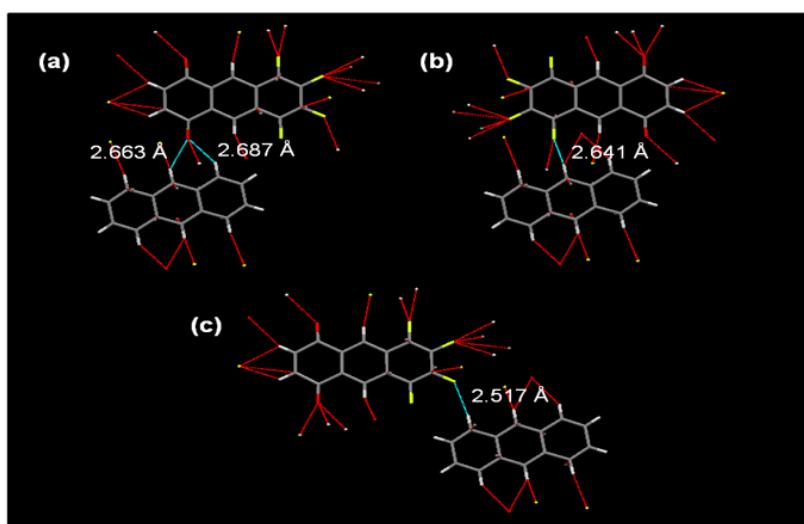

**Figure S23.** Weak C-H...F and C-H...O interactions between two neighbouring TFAQ and AN molecules in the crystal structure of **1**.

The CH...F distances are 2.665 Å, 2.539 Å, 2.651 Å, 2.641 Å and 2.517 Å, respectively, for contacts shown in Figure S14c,e and S15b,c. The sum of van der Waals radii of H and F is 2.56 Å,<sup>7</sup> indicating the existence of a favorable CH...F interaction. The CH...O distances are 2.655 Å, 2.580 Å, 2.663 Å and 2.687 Å, respectively, for contacts shown in Figure S14a,d and S15a. The sum of van der Waals radii of H and O is 2.68 Å,<sup>7</sup> indicating the existence of a favorable CH...O interaction. Also C...F interactions can be observed in Figure S14b,e. The sum of van der Waals radii of C and F is 3.23 Å.<sup>7</sup>

## 8. Crystal Data and Structure Refinement

**Table S2-I** Crystal data and structure refinement for CT complex **1**.

|                                   |                                                                                                                                 |
|-----------------------------------|---------------------------------------------------------------------------------------------------------------------------------|
| Identification code               | <b>1</b>                                                                                                                        |
| Empirical formula                 | C <sub>21</sub> H <sub>9</sub> F <sub>4</sub> O <sub>2</sub>                                                                    |
| Formula weight                    | 369.28                                                                                                                          |
| Temperature                       | 173(2) K                                                                                                                        |
| Wavelength                        | 0.71073 Å                                                                                                                       |
| Crystal system, space group       | Triclinic, P-1                                                                                                                  |
| Unit cell dimensions              | a = 8.3985(17) Å    alpha = 70.94(3) deg.<br>b = 9.819(2) Å    beta = 81.82(3) deg.<br>c = 10.245(2) Å    gamma = 72.29(3) deg. |
| Volume                            | 759.8(3) Å <sup>3</sup>                                                                                                         |
| Z, Calculated density             | 2, 1.614 Mg/ m <sup>3</sup>                                                                                                     |
| Absorption coefficient            | 0.136 mm <sup>-1</sup>                                                                                                          |
| F(000)                            | 374                                                                                                                             |
| Crystal size                      | 0.50 x 0.21 x 0.17 mm                                                                                                           |
| Theta range for data collection   | 2.55 to 27.48 deg.                                                                                                              |
| Limiting indices                  | -10 ≤ h ≤ 10, -10 ≤ k ≤ 12, -13 ≤ l ≤ 9                                                                                         |
| Reflections collected / unique    | 6813 / 3406 [R(int) = 0.0388]                                                                                                   |
| Completeness to theta = 27.48     | 97.9 %                                                                                                                          |
| Absorption correction             | Semi-empirical from equivalents                                                                                                 |
| Max. and min. transmission        | 1.0000 and 0.6693                                                                                                               |
| Refinement method                 | Full-matrix least-squares on F <sup>2</sup>                                                                                     |
| Data / restraints / parameters    | 3406 / 0 / 244                                                                                                                  |
| Goodness-of-fit on F <sup>2</sup> | 1.120                                                                                                                           |
| Final R indices [I > 2sigma(I)]   | R1 = 0.0677, wR2 = 0.1663                                                                                                       |
| R indices (all data)              | R1 = 0.0824, wR2 = 0.1797                                                                                                       |
| Largest diff. peak and hole       | 0.267 and -0.395 e. Å <sup>-3</sup>                                                                                             |



**Table S2-2.** Atomic coordinates ( $\times 10^4$ ) and equivalent isotropic displacement parameters ( $\text{\AA}^2 \times 10^3$ ) for **1**.  $U(\text{eq})$  is defined as one third of the trace of the orthogonalized  $U_{ij}$  tensor.

|       | x        | y        | z        | U(eq) |
|-------|----------|----------|----------|-------|
| F(1)  | -3639(2) | 2349(2)  | 1643(1)  | 41(1) |
| F(2)  | -2760(2) | 4814(2)  | -41(1)   | 43(1) |
| F(3)  | -849(2)  | 6042(2)  | 862(1)   | 38(1) |
| F(4)  | 166(2)   | 4899(2)  | 3491(1)  | 36(1) |
| O(1)  | -3398(2) | -1517(2) | 6310(2)  | 39(1) |
| O(2)  | 283(3)   | 1044(2)  | 8100(2)  | 46(1) |
| C(1)  | -2653(3) | -847(2)  | 6708(2)  | 28(1) |
| C(2)  | -2164(3) | -1361(3) | 8159(2)  | 32(1) |
| C(3)  | -1247(3) | -732(3)  | 8607(2)  | 32(1) |
| C(4)  | -643(3)  | 545(2)   | 7693(2)  | 29(1) |
| C(5)  | -1193(3) | 1168(2)  | 6236(2)  | 23(1) |
| C(6)  | -727(3)  | 2398(2)  | 5367(2)  | 26(1) |
| C(7)  | -1221(3) | 2995(2)  | 3984(2)  | 24(1) |
| C(8)  | -773(3)  | 4259(2)  | 3057(2)  | 26(1) |
| C(9)  | -1276(3) | 4836(2)  | 1739(2)  | 29(1) |
| C(10) | -2259(3) | 4185(3)  | 1268(2)  | 30(1) |
| C(11) | -2701(3) | 2958(3)  | 2118(2)  | 29(1) |
| C(12) | -2213(3) | 2325(2)  | 3508(2)  | 24(1) |
| C(13) | -2675(3) | 1064(2)  | 4422(2)  | 25(1) |
| C(14) | -2168(3) | 492(2)   | 5763(2)  | 24(1) |
| C(15) | -6215(3) | 2492(3)  | -3478(3) | 35(1) |
| C(16) | -5864(3) | 1797(3)  | -2131(3) | 41(1) |
| C(17) | -4868(3) | 2297(3)  | -1474(3) | 41(1) |
| C(18) | -4266(3) | 3487(3)  | -2179(2) | 37(1) |
| C(19) | -4616(3) | 4265(2)  | -3599(2) | 27(1) |
| C(20) | -5608(3) | 3753(2)  | -4263(2) | 29(1) |
| C(21) | -5961(3) | 4496(3)  | -5651(2) | 30(1) |

**Table S2-3.** Bond lengths [Å] and angles [deg] for **1**.

| Bond lengths [Å] | Angles [deg] |
|------------------|--------------|
| F(1)-C(11)       | 1.343(2)     |
| F(2)-C(10)       | 1.348(2)     |
| F(3)-C(9)        | 1.345(2)     |
| F(4)-C(8)        | 1.341(2)     |
| O(1)-C(1)        | 1.220(3)     |
| O(2)-C(4)        | 1.215(3)     |
| C(1)-C(2)        | 1.480(3)     |
| C(1)-C(14)       | 1.489(3)     |
| C(2)-C(3)        | 1.327(3)     |
| C(2)-H(2)        | 0.9500       |
| C(3)-C(4)        | 1.481(3)     |
| C(3)-H(3)        | 0.9500       |
| C(4)-C(5)        | 1.498(3)     |
| C(5)-C(6)        | 1.375(3)     |
| C(5)-C(14)       | 1.414(3)     |
| C(6)-C(7)        | 1.414(3)     |
| C(6)-H(6)        | 0.9500       |
| C(7)-C(8)        | 1.413(3)     |
| C(7)-C(12)       | 1.422(3)     |
| C(8)-C(9)        | 1.357(3)     |
| C(9)-C(10)       | 1.400(3)     |
| C(10)-C(11)      | 1.357(3)     |
| C(11)-C(12)      | 1.419(3)     |
| C(12)-C(13)      | 1.411(3)     |
| C(13)-C(14)      | 1.379(3)     |
| C(13)-H(13)      | 0.9500       |
| C(15)-C(16)      | 1.355(4)     |
| C(15)-C(20)      | 1.434(3)     |
| C(15)-H(15)      | 0.9500       |
| C(16)-C(17)      | 1.422(4)     |
| C(16)-H(16)      | 0.9500       |
| C(17)-C(18)      | 1.359(4)     |
| C(17)-H(17)      | 0.9500       |
| C(18)-C(19)      | 1.431(3)     |

| Bond lengths [Å] | Angles [deg] |
|------------------|--------------|
| C(18)-H(18)      | 0.9500       |
| C(19)-C(21)#1    | 1.395(3)     |
| C(19)-C(20)      | 1.432(3)     |
| C(20)-C(21)      | 1.397(3)     |
| C(21)-C(19)#1    | 1.395(3)     |
| C(21)-H(21)      | 0.9500       |
| O(1)-C(1)-C(2)   | 120.9(2)     |
| O(1)-C(1)-C(14)  | 122.0(2)     |
| C(2)-C(1)-C(14)  | 117.2(2)     |
| C(3)-C(2)-C(1)   | 122.7(2)     |
| C(3)-C(2)-H(2)   | 118.7        |
| C(1)-C(2)-H(2)   | 118.7        |
| C(2)-C(3)-C(4)   | 122.4(2)     |
| C(2)-C(3)-H(3)   | 118.8        |
| C(4)-C(3)-H(3)   | 118.8        |
| O(2)-C(4)-C(3)   | 121.4(2)     |
| O(2)-C(4)-C(5)   | 121.6(2)     |
| C(3)-C(4)-C(5)   | 116.93(19)   |
| C(6)-C(5)-C(14)  | 120.70(19)   |
| C(6)-C(5)-C(4)   | 118.99(19)   |
| C(14)-C(5)-C(4)  | 120.31(19)   |
| C(5)-C(6)-C(7)   | 119.9(2)     |
| C(5)-C(6)-H(6)   | 120.1        |
| C(7)-C(6)-H(6)   | 120.1        |
| C(8)-C(7)-C(6)   | 121.7(2)     |
| C(8)-C(7)-C(12)  | 118.69(19)   |
| C(6)-C(7)-C(12)  | 119.60(19)   |
| F(4)-C(8)-C(9)   | 119.47(19)   |
| F(4)-C(8)-C(7)   | 119.31(18)   |
| C(9)-C(8)-C(7)   | 121.2(2)     |
| F(3)-C(9)-C(8)   | 121.0(2)     |
| F(3)-C(9)-C(10)  | 118.76(19)   |
| C(8)-C(9)-C(10)  | 120.26(19)   |
| F(2)-C(10)-C(11) | 121.3(2)     |
| F(2)-C(10)-C(9)  | 118.24(19)   |

---

| Bond lengths [Å]    | Angles [deg] |
|---------------------|--------------|
| C(11)-C(10)-C(9)    | 120.5(2)     |
| F(1)-C(11)-C(10)    | 119.38(19)   |
| F(1)-C(11)-C(12)    | 119.49(19)   |
| C(10)-C(11)-C(12)   | 121.1(2)     |
| C(13)-C(12)-C(11)   | 122.4(2)     |
| C(13)-C(12)-C(7)    | 119.36(18)   |
| C(11)-C(12)-C(7)    | 118.24(19)   |
| C(14)-C(13)-C(12)   | 120.1(2)     |
| C(14)-C(13)-H(13)   | 119.9        |
| C(12)-C(13)-H(13)   | 119.9        |
| C(13)-C(14)-C(5)    | 120.35(19)   |
| C(13)-C(14)-C(1)    | 119.37(19)   |
| C(5)-C(14)-C(1)     | 120.27(19)   |
| C(16)-C(15)-C(20)   | 120.9(2)     |
| C(16)-C(15)-H(15)   | 119.6        |
| C(20)-C(15)-H(15)   | 119.6        |
| C(15)-C(16)-C(17)   | 120.4(2)     |
| C(15)-C(16)-H(16)   | 119.8        |
| C(17)-C(16)-H(16)   | 119.8        |
| C(18)-C(17)-C(16)   | 120.7(2)     |
| C(18)-C(17)-H(17)   | 119.6        |
| C(16)-C(17)-H(17)   | 119.6        |
| C(17)-C(18)-C(19)   | 120.9(2)     |
| C(17)-C(18)-H(18)   | 119.5        |
| C(19)-C(18)-H(18)   | 119.5        |
| C(21)#1-C(19)-C(18) | 122.5(2)     |
| C(21)#1-C(19)-C(20) | 119.2(2)     |
| C(18)-C(19)-C(20)   | 118.3(2)     |
| C(21)-C(20)-C(19)   | 119.2(2)     |
| C(21)-C(20)-C(15)   | 122.0(2)     |
| C(19)-C(20)-C(15)   | 118.8(2)     |
| C(19)#1-C(21)-C(20) | 121.6(2)     |
| C(19)#1-C(21)-H(21) | 119.2        |
| C(20)-C(21)-H(21)   | 119.2        |

---

**Table S2-4.** Anisotropic displacement parameters ( $\text{\AA}^2 \times 10^3$ ) for **1**. The anisotropic displacement factor exponent takes the form:  $-2 \pi^2 [h^2 a^{*2} U^{11} + \dots + 2 h k a^* b^* U^{12}]$

|       | U11   | U22   | U33   | U23    | U13    | U12    |
|-------|-------|-------|-------|--------|--------|--------|
| F(1)  | 48(1) | 51(1) | 31(1) | -7(1)  | -9(1)  | -24(1) |
| F(2)  | 52(1) | 47(1) | 23(1) | 0(1)   | -8(1)  | -13(1) |
| F(3)  | 47(1) | 29(1) | 29(1) | 2(1)   | 4(1)   | -13(1) |
| F(4)  | 45(1) | 33(1) | 35(1) | -5(1)  | -4(1)  | -20(1) |
| O(1)  | 47(1) | 36(1) | 38(1) | -5(1)  | -4(1)  | -22(1) |
| O(2)  | 59(1) | 55(1) | 30(1) | -3(1)  | -12(1) | -31(1) |
| C(1)  | 27(1) | 25(1) | 29(1) | -5(1)  | 2(1)   | -5(1)  |
| C(2)  | 36(1) | 26(1) | 27(1) | -1(1)  | 1(1)   | -8(1)  |
| C(3)  | 38(1) | 30(1) | 21(1) | -1(1)  | -3(1)  | -7(1)  |
| C(4)  | 30(1) | 29(1) | 25(1) | -5(1)  | -3(1)  | -6(1)  |
| C(5)  | 24(1) | 22(1) | 21(1) | -6(1)  | -1(1)  | -3(1)  |
| C(6)  | 28(1) | 25(1) | 25(1) | -9(1)  | -1(1)  | -8(1)  |
| C(7)  | 24(1) | 22(1) | 24(1) | -6(1)  | 1(1)   | -5(1)  |
| C(8)  | 29(1) | 25(1) | 27(1) | -9(1)  | 1(1)   | -9(1)  |
| C(9)  | 31(1) | 23(1) | 25(1) | -2(1)  | 4(1)   | -6(1)  |
| C(10) | 33(1) | 31(1) | 19(1) | -3(1)  | -2(1)  | -3(1)  |
| C(11) | 29(1) | 33(1) | 25(1) | -9(1)  | -4(1)  | -9(1)  |
| C(12) | 25(1) | 24(1) | 20(1) | -5(1)  | 0(1)   | -4(1)  |
| C(13) | 25(1) | 26(1) | 25(1) | -9(1)  | -1(1)  | -6(1)  |
| C(14) | 24(1) | 22(1) | 24(1) | -7(1)  | 1(1)   | -5(1)  |
| C(15) | 34(1) | 30(1) | 42(1) | -14(1) | 4(1)   | -11(1) |
| C(16) | 40(1) | 33(1) | 41(1) | -7(1)  | 11(1)  | -8(1)  |
| C(17) | 44(2) | 37(1) | 28(1) | -6(1)  | 1(1)   | 3(1)   |
| C(18) | 36(1) | 38(1) | 33(1) | -11(1) | -4(1)  | -3(1)  |
| C(19) | 26(1) | 27(1) | 28(1) | -11(1) | 0(1)   | -2(1)  |
| C(20) | 24(1) | 25(1) | 35(1) | -10(1) | 3(1)   | -4(1)  |
| C(21) | 27(1) | 31(1) | 33(1) | -13(1) | -4(1)  | -6(1)  |

**Table S2-5.** Hydrogen coordinates ( $\times 10^4$ ) and isotropic displacement parameters ( $\text{\AA}^2 \times 10^3$ ) for **1**

|       | x     | y     | z     | U(eq) |
|-------|-------|-------|-------|-------|
| H(2)  | -2521 | -2174 | 8796  | 38    |
| H(3)  | -967  | -1115 | 9550  | 38    |
| H(6)  | -74   | 2846  | 5695  | 31    |
| H(13) | -3336 | 609   | 4112  | 30    |
| H(15) | -6872 | 2140  | -3908 | 42    |
| H(16) | -6286 | 970   | -1623 | 49    |
| H(17) | -4620 | 1794  | -531  | 49    |
| H(18) | -3605 | 3807  | -1722 | 44    |
| H(21) | -6608 | 4149  | -6095 | 36    |

**Table S2-6.** Torsion angles [deg] for **1**.

---

|                         |             |
|-------------------------|-------------|
| O(1)-C(1)-C(2)-C(3)     | 174.9(2)    |
| C(14)-C(1)-C(2)-C(3)    | -3.9(3)     |
| C(1)-C(2)-C(3)-C(4)     | 0.4(4)      |
| C(2)-C(3)-C(4)-O(2)     | -175.2(2)   |
| C(2)-C(3)-C(4)-C(5)     | 3.3(3)      |
| O(2)-C(4)-C(5)-C(6)     | -4.4(3)     |
| C(3)-C(4)-C(5)-C(6)     | 177.0(2)    |
| O(2)-C(4)-C(5)-C(14)    | 175.2(2)    |
| C(3)-C(4)-C(5)-C(14)    | -3.3(3)     |
| C(14)-C(5)-C(6)-C(7)    | -0.2(3)     |
| C(4)-C(5)-C(6)-C(7)     | 179.45(18)  |
| C(5)-C(6)-C(7)-C(8)     | 179.86(19)  |
| C(5)-C(6)-C(7)-C(12)    | 0.7(3)      |
| C(6)-C(7)-C(8)-F(4)     | 1.0(3)      |
| C(12)-C(7)-C(8)-F(4)    | -179.84(18) |
| C(6)-C(7)-C(8)-C(9)     | -178.9(2)   |
| C(12)-C(7)-C(8)-C(9)    | 0.2(3)      |
| F(4)-C(8)-C(9)-F(3)     | -0.1(3)     |
| C(7)-C(8)-C(9)-F(3)     | 179.81(19)  |
| F(4)-C(8)-C(9)-C(10)    | -179.85(19) |
| C(7)-C(8)-C(9)-C(10)    | 0.1(3)      |
| F(3)-C(9)-C(10)-F(2)    | -1.1(3)     |
| C(8)-C(9)-C(10)-F(2)    | 178.66(19)  |
| F(3)-C(9)-C(10)-C(11)   | 179.3(2)    |
| C(8)-C(9)-C(10)-C(11)   | -0.9(3)     |
| F(2)-C(10)-C(11)-F(1)   | 0.7(3)      |
| C(9)-C(10)-C(11)-F(1)   | -179.74(19) |
| F(2)-C(10)-C(11)-C(12)  | -178.12(19) |
| C(9)-C(10)-C(11)-C(12)  | 1.5(4)      |
| F(1)-C(11)-C(12)-C(13)  | 0.2(3)      |
| C(10)-C(11)-C(12)-C(13) | 179.0(2)    |
| F(1)-C(11)-C(12)-C(7)   | -179.92(19) |
| C(10)-C(11)-C(12)-C(7)  | -1.1(3)     |
| C(8)-C(7)-C(12)-C(13)   | -179.85(19) |
| C(6)-C(7)-C(12)-C(13)   | -0.6(3)     |

|                           |             |
|---------------------------|-------------|
| C(8)-C(7)-C(12)-C(11)     | 0.3(3)      |
| C(6)-C(7)-C(12)-C(11)     | 179.47(19)  |
| C(11)-C(12)-C(13)-C(14)   | 180.0(2)    |
| C(7)-C(12)-C(13)-C(14)    | 0.1(3)      |
| C(12)-C(13)-C(14)-C(5)    | 0.4(3)      |
| C(12)-C(13)-C(14)-C(1)    | -179.42(18) |
| C(6)-C(5)-C(14)-C(13)     | -0.4(3)     |
| C(4)-C(5)-C(14)-C(13)     | 180.00(19)  |
| C(6)-C(5)-C(14)-C(1)      | 179.45(19)  |
| C(4)-C(5)-C(14)-C(1)      | -0.2(3)     |
| O(1)-C(1)-C(14)-C(13)     | 4.8(3)      |
| C(2)-C(1)-C(14)-C(13)     | -176.43(19) |
| O(1)-C(1)-C(14)-C(5)      | -175.1(2)   |
| C(2)-C(1)-C(14)-C(5)      | 3.7(3)      |
| C(20)-C(15)-C(16)-C(17)   | -0.7(4)     |
| C(15)-C(16)-C(17)-C(18)   | 0.7(4)      |
| C(16)-C(17)-C(18)-C(19)   | -0.1(4)     |
| C(17)-C(18)-C(19)-C(21)#1 | 179.0(2)    |
| C(17)-C(18)-C(19)-C(20)   | -0.4(3)     |
| C(21)#1-C(19)-C(20)-C(21) | 0.7(3)      |
| C(18)-C(19)-C(20)-C(21)   | -179.9(2)   |
| C(21)#1-C(19)-C(20)-C(15) | -179.1(2)   |
| C(18)-C(19)-C(20)-C(15)   | 0.3(3)      |
| C(16)-C(15)-C(20)-C(21)   | -179.6(2)   |
| C(16)-C(15)-C(20)-C(19)   | 0.2(3)      |
| C(19)-C(20)-C(21)-C(19)#1 | -0.7(4)     |
| C(15)-C(20)-C(21)-C(19)#1 | 179.1(2)    |

---



## References

1. Chen, Z.; Swager, T. M. *Org. Lett.* **2007**, *9*, 997.
2. Pommerehne, J.; Vestweber, H.; Guss, W.; Mahrt, R. F.; Bassler, H.; Porsch, M.; Daub, J. *Adv. Mater.* **1995**, *7*, 551.
3. Sun, Q.; Wang, H.; Yang, C.; Li, Y. *J. Mater. Chem.* **2003**, *13*, 800.
4. (a) Becke, A. D. *Phys. Rev. A* **1988**, *38*, 3098. (b) Lee, C.; Yang, W.; Parr, G. G. *Phys. Rev. B* **1988**, *37*, 785.
5. Frisch, M. J.; Trucks, G. W.; Schlegel, H. B.; Scuseria, G. E.; Robb, M. A.; Cheeseman, J. R.; Montgomery, J. A. Jr.; Vreven, T.; Kudin, K. N.; Burant, J. C.; Millam, J. M.; Iyengar, S. S.; Tomasi, J.; Barone, V.; Mennucci, B.; Cossi, M.; Scalmani, G.; Rega, N.; Petersson, G. A.; Nakatsuji, H.; Hada, M.; Ehara, M.; Toyota, K.; Fukuda, R.; Hasegawa, J.; Ishida, M.; Nakajima, T.; Honda, Y.; Kitao, O.; Nakai, H.; Klene, M.; Li, X.; Knox, J. E.; Hratchian, H. P.; Cross, J. B.; Adamo, C.; Jaramillo, J.; Gomperts, R.; Stratmann, R. E.; Yazyev, O.; Austin, A. J.; Cammi, R.; Pomelli, C.; Ochterski, J. W.; Ayala, P. Y.; Morokuma, K.; Voth, G. A.; Salvador, P.; Dannenberg, J. J.; Zakrzewski, V. G.; Dapprich, S.; Daniels, A. D.; Strain, M. C.; Farkas, O.; Malick, D. K.; Rabuck, A. D.; Raghavachari, K.; Foresman, J. B.; Ortiz, J. V.; Cui, Q.; Baboul, A. G.; Clifford, S.; Cioslowski, J.; Stefanov, B. B.; Liu, G.; Liashenko, A.; Piskorz, P.; Komaromi, I.; Martin, R. L.; Fox, D. J.; Keith, T.; Al-Laham, M. A.; Peng, C. Y.; Nanayakkara, A.; Challacombe, M.; Gill, P. M. W.; Johnson, B.; Chen, W.; Wong, M. W.; Gonzalez, C.; Pople, J. A. *Gaussian 03*, Revision C.02; Gaussian Inc.: Wallingford CT, 2004.
6. Dennington, R., II; Keith, T.; Millam, J.; Eppinnett, K.; Hovell, W. L.; Gilliland, R. *GaussView*, Version 3.09; Semichem, Inc.: Shawnee Mission, KS, 2003.
7. Rowland, R. S.; Taylor, R. *J. Phys. Chem.* **1996**, *100*, 7384.
